# Supplementary material for: Relationship of cardiometabolic parameters in non-smokers, current smokers, and quitters in diabetes: a systematic review and meta-analysis
Source: Springer Nature journal article supplement (doi:10.1186/s12933-016-0475-5), 2016-11-23
Supplement: MOESM1 [file 11100250]

NICE

FINAL SEARCH 20/05/16  
 Healthcare Databases Advanced Search

Select Database Saved Searches Search Recover Searches Alerts My OpenAthens Account

Home » Database select » Search and Limits

## Search history

| Line                                | Database | Search Term                                                                                                                    | View Results                                  |
|-------------------------------------|----------|--------------------------------------------------------------------------------------------------------------------------------|-----------------------------------------------|
| <input type="checkbox"/> Select All | Save all | Save selected lines                                                                                                            | Delete selected  Remove duplicates ? Collapse |
| <input checked="" type="checkbox"/> | 1        | CINAHL exp DIABETES MELLITUS, TYPE 2/ OR exp DIABETES MELLITUS, TYPE 1/                                                        | 35535                                         |
| <input checked="" type="checkbox"/> | 2        | CINAHL "Diabetes".ti,ab                                                                                                        | 69041                                         |
| <input checked="" type="checkbox"/> | 3        | CINAHL T2DM.ti,ab                                                                                                              | 1303                                          |
| <input checked="" type="checkbox"/> | 4        | CINAHL T1DM.ti,ab                                                                                                              | 288                                           |
| <input checked="" type="checkbox"/> | 5        | CINAHL (IDDM OR insulin AND dependent AND diabetes AND mellitus OR insulin AND treated AND diabetes).ti,ab                     | 2630                                          |
| <input checked="" type="checkbox"/> | 6        | CINAHL (non AND insulin AND dependent AND diabetes AND mellitus).ti,ab                                                         | 454                                           |
| <input checked="" type="checkbox"/> | 7        | CINAHL (NIDDM OR non AND insulin AND treated AND diabetes).ti,ab                                                               | 14097                                         |
| <input checked="" type="checkbox"/> | 8        | CINAHL 1 OR 2 OR 3 OR 4 OR 5 OR 6 OR 7                                                                                         | 77358                                         |
| <input checked="" type="checkbox"/> | 9        | CINAHL (Cigarette AND smoking OR smoking OR tobacco AND addiction AND disorder OR active AND smoking).ti,ab                    | 31984                                         |
| <input checked="" type="checkbox"/> | 10       | CINAHL 8 AND 9                                                                                                                 | 3395                                          |
| <input checked="" type="checkbox"/> | 11       | CINAHL ("glycaemic control" OR HbA1c OR blood AND glucose).ti,ab                                                               | 14456                                         |
| <input checked="" type="checkbox"/> | 12       | CINAHL ("Lipid profile" OR Low AND density AND lipoprotein OR LDL OR High AND Density AND Lipoprotein OR HDL).ti,ab            | 10016                                         |
| <input checked="" type="checkbox"/> | 13       | CINAHL ("blood pressure" OR BP OR systolic AND blood AND pressure OR SBP OR Diastolic AND Blood AND Pressure OR DBP).ti,ab     | 28465                                         |
| <input checked="" type="checkbox"/> | 19       | EMBASE exp DIABETES MELLITUS/                                                                                                  | 701831                                        |
| <input checked="" type="checkbox"/> | 20       | EMBASE ("diabetes" OR DM OR T1DM OR Insulin AND dependent AND diabetes).ti,ab                                                  | 52434                                         |
| <input checked="" type="checkbox"/> | 21       | EMBASE (Type AND 2 AND diabetes AND mellitus OR Type AND 2 AND DM OR T2DM OR non AND insulin AND dependent AND diabetes).ti,ab | 15137                                         |
| <input checked="" type="checkbox"/> | 22       | EMBASE (NIDDM OR IDDM).ti,ab                                                                                                   | 14088                                         |
| <input checked="" type="checkbox"/> | 23       | EMBASE 19 OR 20 OR 21 OR 22                                                                                                    | 710395                                        |
| <input checked="" type="checkbox"/> | 24       | EMBASE ("smoking" OR cigarette AND smoking OR tobacco AND exposure).ti,ab                                                      | 36489                                         |
| <input checked="" type="checkbox"/> | 25       | EMBASE (glycaemic AND control OR HbA1C OR blood AND glucose).ti,ab                                                             | 152213                                        |
| <input checked="" type="checkbox"/> | 26       | EMBASE 23 AND 24 AND 25                                                                                                        | 113                                           |
| <input checked="" type="checkbox"/> | 27       | EMBASE ("lipid profile" OR lipid OR low AND density AND lipoprotein OR LDL OR high AND density AND lipoprotein OR HDL).ti,ab   | 134650                                        |
| <input checked="" type="checkbox"/> | 28       | EMBASE 23 AND 24 AND 27                                                                                                        | 104                                           |
| <input checked="" type="checkbox"/> | 29       | EMBASE ("blood pressure" OR BP OR systolic AND blood AND pressure OR SBP OR diastolic AND blood AND pressure OR DBP).ti,ab     | 329193                                        |
| <input checked="" type="checkbox"/> | 30       | EMBASE 23 AND 24 AND 29                                                                                                        | 214                                           |
| <input checked="" type="checkbox"/> | 32       | EMBASE 23 AND 24 AND 31                                                                                                        | 449                                           |
| <input checked="" type="checkbox"/> | 33       | CINAHL (smoking AND cessation).ti,ab                                                                                           | 7068                                          |
| <input checked="" type="checkbox"/> | 34       | CINAHL (Quit OR give AND up OR abstain).ti,ab                                                                                  | 6604                                          |
| <input checked="" type="checkbox"/> | 35       | CINAHL 33 OR 34                                                                                                                | 11540                                         |
| <input checked="" type="checkbox"/> | 36       | CINAHL 9 OR 35                                                                                                                 | 35249                                         |
| <input checked="" type="checkbox"/> | 37       | CINAHL 8 AND 36                                                                                                                | 3464                                          |

|                                     |    |                                               |       |                              |
|-------------------------------------|----|-----------------------------------------------|-------|------------------------------|
| <input checked="" type="checkbox"/> | 38 | CINAHL 11 AND 37                              | 483   | <a href="#">Apply Limits</a> |
| <input checked="" type="checkbox"/> | 39 | CINAHL 12 AND 37                              | 500   | <a href="#">Apply Limits</a> |
| <input checked="" type="checkbox"/> | 40 | CINAHL 13 AND 37                              | 915   | <a href="#">Apply Limits</a> |
| <input checked="" type="checkbox"/> | 41 | EMBASE (smoking AND cessation).ti,ab          | 27657 | <a href="#">Apply Limits</a> |
| <input checked="" type="checkbox"/> | 42 | EMBASE (quit OR give AND up OR abstain).ti,ab | 27940 | <a href="#">Apply Limits</a> |
| <input checked="" type="checkbox"/> | 43 | EMBASE 41 OR 42                               | 52924 | <a href="#">Apply Limits</a> |
| <input checked="" type="checkbox"/> | 44 | EMBASE 24 OR 43                               | 87053 | <a href="#">Apply Limits</a> |
| <input checked="" type="checkbox"/> | 45 | EMBASE 23 AND 44                              | 3702  | <a href="#">Apply Limits</a> |
| <input checked="" type="checkbox"/> | 46 | EMBASE 25 AND 45                              | 368   | <a href="#">Apply Limits</a> |
| <input checked="" type="checkbox"/> | 47 | EMBASE 27 AND 45                              | 295   | <a href="#">Apply Limits</a> |
| <input checked="" type="checkbox"/> | 48 | EMBASE 29 AND 45                              | 730   | <a href="#">Apply Limits</a> |

Combine selected

AND  OR

To combine two line numbers using NOT, enter the line numbers in the search box below: for example 1 NOT 2

You are currently searching **EMBASE** Search another

[» Re-run all line numbers](#)

or [» Re-run selected line numbers](#)

Search

Limits

Search Keyword:

Enter search words or line numbers in the box below. You may use AND, OR, NOT to combine search words. Use \* to search for word stems, "inverted commas" to search for phrases and round brackets () to nest words.

?

[Browse Thesaurus](#)

IN

- Title and Abstract
- Any field
- Publication Type
- Title
- Journal Name \*
- Abstract
- Author \*
- ISSN

[More fields](#)

Map to Thesaurus

?

\* For Author and Journal name enter search terms in "quotation marks".

?

[Search](#)

0 Clipboard is empty [205 Recover searches](#)

## About Evidence Services

Clinical Knowledge Summaries  
Journals and Databases  
Evidence Search  
Evidence Uncertainties (UK DUETs)

How to use HDAS  
More information about journals and databases

 Subscribe to our evidence awareness bulletins and access Evidence Updates

[Sitemap](#) [Terms and Conditions](#) [Contact Us](#) [FAQs](#) [Help](#)

Follow us: 

Copyright © 2016 National Institute for Health and Care Excellence. All Rights Reserved.

Provided by NI
