# Supplementary material for: Relationship of cardiometabolic parameters in non-smokers, current smokers, and quitters in diabetes: a systematic review and meta-analysis
Source: Springer Nature journal article supplement (doi:10.1186/s12933-016-0475-5), 2016-11-23
Supplement: MOESM2 [file 11100250]

# FINAL OVID/MEDLINE SEARCH (21.05.16)

Database(s): Ovid MEDLINE(R) In-Process & Other Non-Indexed Citations and Ovid MEDLINE(R) 1946 to Present

Search Strategy:

| #  | Searches                                                                                                                                                                                                                                                                                               | Results | Annotations                                |
|----|--------------------------------------------------------------------------------------------------------------------------------------------------------------------------------------------------------------------------------------------------------------------------------------------------------|---------|--------------------------------------------|
| 1  | exp diabetes mellitus/                                                                                                                                                                                                                                                                                 | 348228  |                                            |
| 2  | diabet*.ti,ab,ot.                                                                                                                                                                                                                                                                                      | 474512  |                                            |
| 3  | (IDDM or NIDDM or MODY or T1DM or T2DM or T1D or T2D).ti,ab,ot.                                                                                                                                                                                                                                        | 32604   |                                            |
| 4  | (non insulin* depend* or non insulin* depend* or non insulin ?depend* or non insulin ? depend*).ti,ab,ot.                                                                                                                                                                                              | 10681   |                                            |
| 5  | (insulin* depend* or insulin?depend*).ti,ab,ot.                                                                                                                                                                                                                                                        | 28385   |                                            |
| 6  | (Insulin* treated* Type 2 diabetes or insulin treated T2DM or insulin treated T2D).ti,ab,ot.                                                                                                                                                                                                           | 230     |                                            |
| 7  | exp smoking cessation/                                                                                                                                                                                                                                                                                 | 23079   |                                            |
| 8  | "Tobacco Use Cessation"/                                                                                                                                                                                                                                                                               | 870     |                                            |
| 9  | ((smoking or tobacco) adj cessation).ti,ab,ot.                                                                                                                                                                                                                                                         | 19480   |                                            |
| 10 | ((quit* or stop* or cease* or giv*) adj5 smoking).ti,ab.                                                                                                                                                                                                                                               | 12513   |                                            |
| 11 | (smoker* or continued smoker* or persistent smoker*).ti,ab,ot.                                                                                                                                                                                                                                         | 68617   |                                            |
| 12 | "Tobacco Use Disorder"/                                                                                                                                                                                                                                                                                | 9268    |                                            |
| 13 | (Lipid profile or lipid level or LDL).mp. or low density lipoprotein/ [mp=title, abstract, original title, name of substance word, subject heading word, keyword heading word, protocol supplementary concept word, rare disease supplementary concept word, unique identifier]                        | 94077   |                                            |
| 14 | HbA1C*.mp. or glycated* haemoglobin*/ [mp=title, abstract, original title, name of substance word, subject heading word, keyword heading word, protocol supplementary concept word, rare disease supplementary concept word, unique identifier]                                                        | 20239   |                                            |
| 15 | (High Density Lipoprotein or HDL).mp. [mp=title, abstract, original title, name of substance word, subject heading word, keyword heading word, protocol supplementary concept word, rare disease supplementary concept word, unique identifier]                                                        | 80124   |                                            |
| 16 | (Blood pressure or hypertension or systolic blood pressure or diastolic blood pressure*).mp. [mp=title, abstract, original title, name of substance word, subject heading word, keyword heading word, protocol supplementary concept word, rare disease supplementary concept word, unique identifier] | 661407  |                                            |
| 17 | 1 or 2 or 3 or 4 or 5 or 6                                                                                                                                                                                                                                                                             | 531587  | Any type of DM                             |
| 18 | 7 or 8 or 9 or 10 or 11 or 12                                                                                                                                                                                                                                                                          | 90998   | Smoking or smoking cessation               |
| 19 | 17 and 18                                                                                                                                                                                                                                                                                              | 5533    | DM + Smoking (S) or Smoking Cessation (SC) |
| 20 | 14 and 19                                                                                                                                                                                                                                                                                              | 192     | DM + S/SC + HbA1C                          |
| 21 | 16 and 19                                                                                                                                                                                                                                                                                              | 2999    | DM + S/SC + BP                             |
| 22 | 13 or 15                                                                                                                                                                                                                                                                                               | 133312  | HDL or LDL or Lipid Profile                |
| 23 | 19 and 22                                                                                                                                                                                                                                                                                              | 710     | DM + S/SC + Lipid Profile                  |
